# Supplementary material for: Self-assisted membrane-penetrating helical polypeptides mediate anti-inflammatory RNAi against myocardial ischemic reperfusion (IR) injury
Source: Royal Society of Chemistry journal article supplement (doi:10.1039/c9bm00719a), 2019-01-01
Supplement: c9bm00719a1.pdf [file c9bm00719a1.pdf]

Supporting information

## **Self-Assisted Membrane-Penetrating Helical Polypeptides Mediate Anti-Inflammatory RNAi against Myocardial Ischemic Reperfusion (IR) Injury**

Qiujun Liang,<sup>a</sup> Fangfang Li,<sup>a</sup> Yongjuan Li,<sup>a</sup> Yong Liu,<sup>\* b</sup> Min Lan,<sup>a</sup> Songhua Wu,<sup>c</sup>  
Xuejie Wu,<sup>c</sup> Yong Ji,<sup>\* d</sup> Rujing Zhang,<sup>e</sup> Lichen Yin<sup>\* a</sup>

<sup>a</sup> Institute of Functional Nano and Soft Materials (FUNSOM), Jiangsu Key Laboratory for Carbon-Based Functional Materials and Devices, Collaborative Innovation Center of Suzhou Nano Science & Technology, Soochow University, Suzhou 215123, China.

<sup>b</sup> Department of Biomedical Engineering, University of Groningen and University Medical Center Groningen, Antonius Deusinglaan 1, 9713 AV Groningen, The Netherlands

<sup>c</sup> Department of Cardiothoracic Surgery, the Second Affiliated Hospital of Soochow University, Suzhou 215004, China.

<sup>d</sup> Department of Cardiothoracic Surgery, Wuxi People's Hospital Affiliated to Nanjing Medical University, Wuxi 214023, China

<sup>e</sup> Department of Micro- and Nanotechnology, DTU Nanotech, Technical University of Denmark, 2800 Kgs. Lyngby, Denmark.

\*Email: [lcyin@suda.edu.cn](mailto:lcyin@suda.edu.cn) (L. Yin); [jijongmvp@163.com](mailto:jijongmvp@163.com) (Y. Ji); [y.liu@umcg.nl](mailto:y.liu@umcg.nl) (Y. Liu)

## Instrumentation

<sup>1</sup>H NMR spectra were recorded on a Varian U400 MHz spectrometer.

Gel permeation chromatography (GPC) experiments were conducted on a system equipped with an isocratic pump (Model 1260, Agilent Technology), a multi-angle laser light scattering (MALLS) detector (Agilent Technology), and a refractive index detector (Agilent Technology). Separations were performed using serially connected size exclusion columns (5  $\mu$ m, Agilent Technology) using DMF containing 0.05 M LiBr as the mobile phase. The MWs were determined based on the dn/dc value of polymers calculated offline by using the internal calibration system processed by the same software.

Circular dichroism (CD) experiments were performed on a JASCO J-815 CD spectrometer. Polypeptides were dissolved in deionized (DI) water at the concentrations of 0.05 mg/mL. The solution was placed in a quartz cell with a light path of 1 mm. The mean residue molar ellipticity of each polypeptide was calculated based on the measured apparent ellipticity by the following equation: Ellipticity ( $[\theta]$  in  $\text{deg}\cdot\text{cm}^2\cdot\text{dmol}^{-1}$ ) = (millidegrees  $\times$  mean residue weight)/(pathlength in millimeters concentration of polypeptide in  $\text{mg mL}^{-1}$ ). The helicity of the polypeptides was calculated by the following formula: helicity =  $(-[\theta_{222}] + 3000)/39000$ .<sup>1</sup>

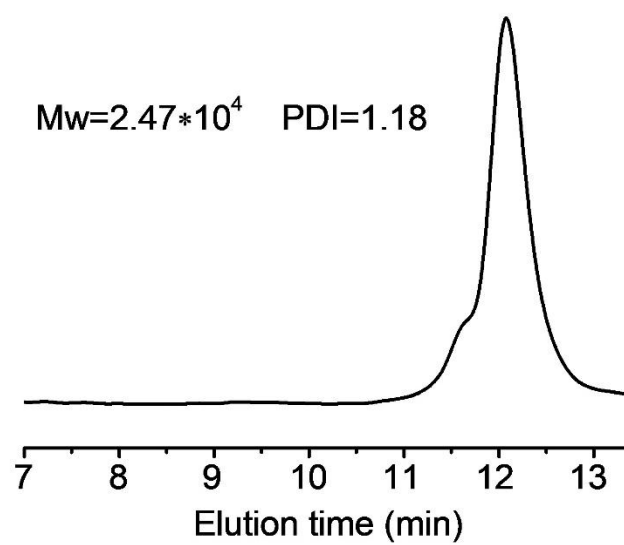

**Fig. S1.** GPC trace of the PPLG polymer.

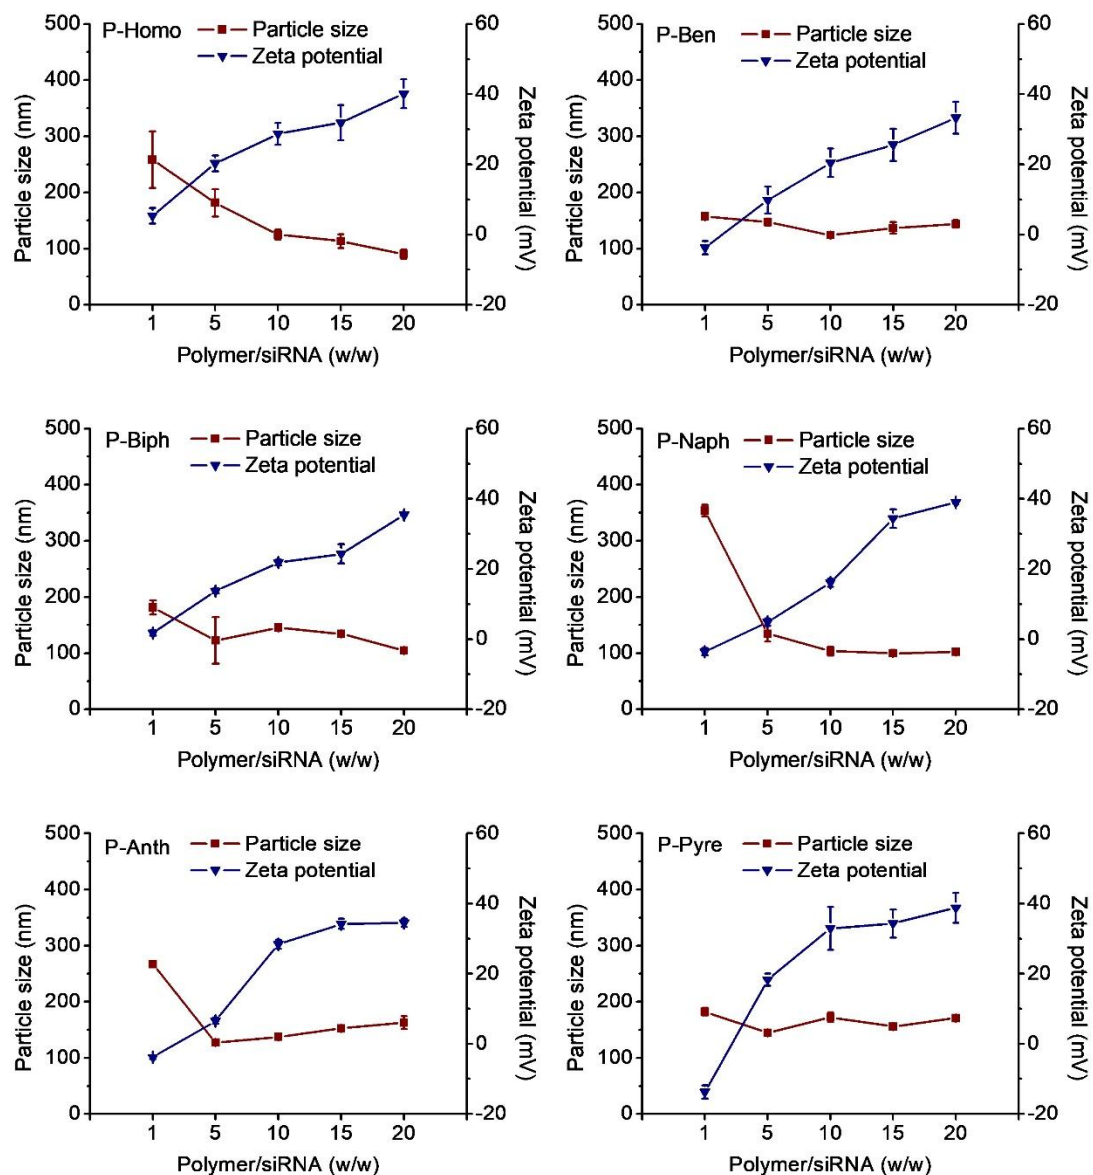

**Fig. S2.** Particle size and zeta potential of polypeptide/siRNA polyplexes in DEPC at various polymer/siRNA ratios as determined by DLS measurement.

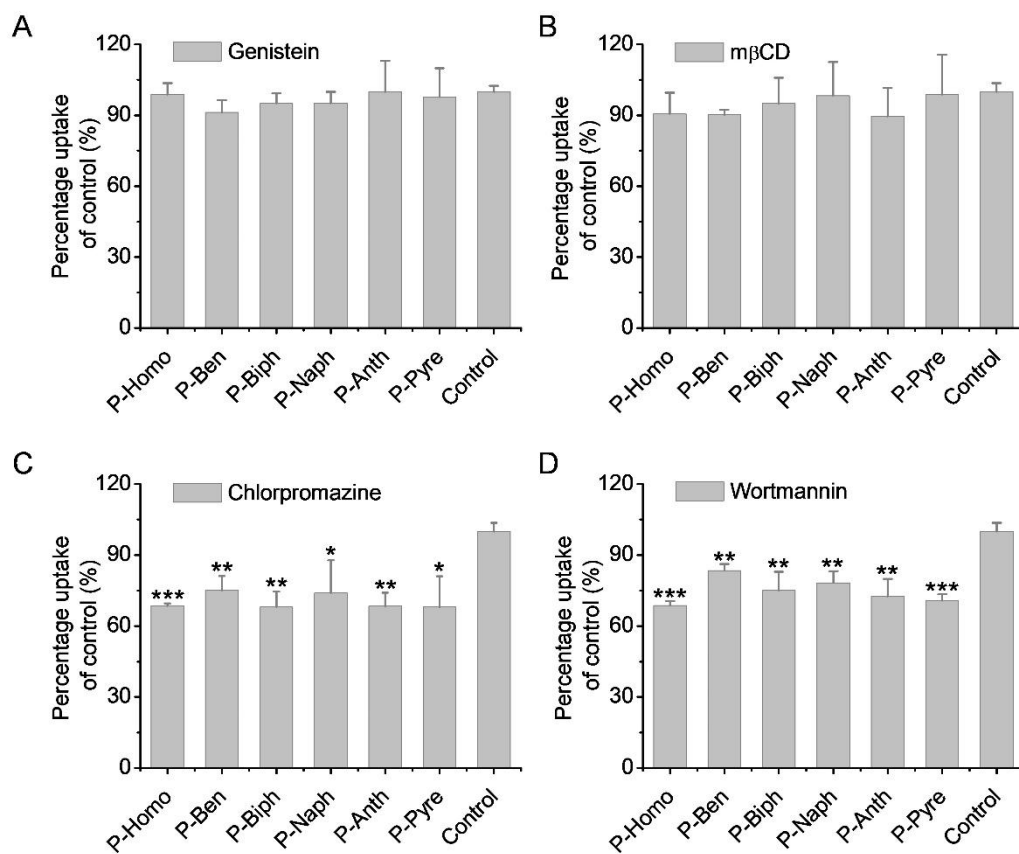

**Fig. S3.** Relative uptake levels of different polypeptide/FAM-siRNA polyplexes (w/w = 15) in H9C2 cells in the presence of various endocytic inhibitors (n = 3).

**Table S1.** Sequences of siRAGE and siScr.

|        |            | Sequence                        |
|--------|------------|---------------------------------|
| siRAGE | Sense      | 5'-CACUCUACGAUCCCAAUUCAdTdT-3'  |
|        | Anti-sense | 5'-UUGAAUUGGGAUCGUAGAGUGdTdT-3' |
| siScr  | Sense      | 5'-UUCUCCGAACGUGUCACGUTT-3'     |
|        | Anti-sense | 5'-ACGUGACACGUUCGGAGAATT-3'     |

**Table S2.** Primer sequences of RAGE and GAPDH.

|       |         | Sequence                       |
|-------|---------|--------------------------------|
| RAGE  | Forward | 5'-GAATCCTCCCAATGGTTCA-3'      |
|       | Reverse | 5'-GCCCGACACCGGAAAGT-3'        |
| GAPDH | Forward | 5'-CATGCCGCCTGGAAACCTGCCA-3'   |
|       | Reverse | 5'-TGGGCTGGGTGGTCCAGGGGTTTC-3' |

**Table S3. <sup>1</sup>H NMR spectral data of chemicals synthesized.**

| Chemicals           | <sup>1</sup> H NMR spectral data                                                                                                                                                                                                                                                                                                                                                                                                                                                                                                                                                                                                                                                                                                                                                                                                   |
|---------------------|------------------------------------------------------------------------------------------------------------------------------------------------------------------------------------------------------------------------------------------------------------------------------------------------------------------------------------------------------------------------------------------------------------------------------------------------------------------------------------------------------------------------------------------------------------------------------------------------------------------------------------------------------------------------------------------------------------------------------------------------------------------------------------------------------------------------------------|
| N <sub>3</sub> -HG  | (400 MHz, CDCl <sub>3</sub> , δ, ppm): 3.34 (t, 2H, -CH <sub>2</sub> NHC(NH)NH <sub>2</sub> ), 3.21 (t, 2H, -CH <sub>2</sub> N <sub>3</sub> ), 1.76 (m, 2H, -CH <sub>2</sub> CH <sub>2</sub> NHC(NH)NH <sub>2</sub> ), 1.65 (m, 2H, -CH <sub>2</sub> CH <sub>2</sub> N <sub>3</sub> ), 1.32 (m, 4H, -(CH <sub>2</sub> ) <sub>2</sub> (CH <sub>2</sub> ) <sub>2</sub> N <sub>3</sub> ).                                                                                                                                                                                                                                                                                                                                                                                                                                             |
| Ben-N <sub>3</sub>  | (400 MHz, CDCl <sub>3</sub> , δ, ppm) : 7.78 (m, 2H, ArH), 7.31 (m, 3H, ArH), 4.62 (s, 2H, -CH <sub>2</sub> Ar)                                                                                                                                                                                                                                                                                                                                                                                                                                                                                                                                                                                                                                                                                                                    |
| Naph-N <sub>3</sub> | (400 MHz, CDCl <sub>3</sub> , δ, ppm) : 8.30 (1H, d, ArH), 7.85 (2H, m, ArH), 7.54 (2H, m, ArH), 7.43 (2H, m, ArH), 5.44 (s, 2H, -CH <sub>2</sub> Ar)                                                                                                                                                                                                                                                                                                                                                                                                                                                                                                                                                                                                                                                                              |
| Biph-N <sub>3</sub> | (400 MHz, CDCl <sub>3</sub> , δ, ppm) : 7.60 (m, 4H, ArH), 7.46 (t, 2H, ArH), 7.37 (m, 3H, ArH), 4.38 (s, 2H, -CH <sub>2</sub> Ar)                                                                                                                                                                                                                                                                                                                                                                                                                                                                                                                                                                                                                                                                                                 |
| Anth-N <sub>3</sub> | (400 MHz, CDCl <sub>3</sub> , δ, ppm) : 8.56 (s, 1H, ArH), 8.33 (d, 2H, ArH), 8.10 (d, 2H, ArH), 7.60 (t, 2H, ArH), 7.53 (t, 2H, ArH), 5.39 (s, 2H, -CH <sub>2</sub> Ar)                                                                                                                                                                                                                                                                                                                                                                                                                                                                                                                                                                                                                                                           |
| Pyre-N <sub>3</sub> | (400 MHz, CDCl <sub>3</sub> , δ, ppm) : 8.31 (m, 4H, ArH), 8.16 (m, 5H, ArH), 4.94 (s, 2H, -CH <sub>2</sub> Ar)                                                                                                                                                                                                                                                                                                                                                                                                                                                                                                                                                                                                                                                                                                                    |
| PPLG                | (400 MHz, CDCl <sub>3</sub> , δ, ppm) : 4.57 (s, 1H, -CH <sub>2</sub> C≡CH), 3.98 (s, 1H, α-H), 2.60–2.47 (br, 3H, -CH <sub>2</sub> CH <sub>2</sub> COO- and -C≡CH), 2.28–2.10 (br, 2H, -CH <sub>2</sub> CH <sub>2</sub> COO-).                                                                                                                                                                                                                                                                                                                                                                                                                                                                                                                                                                                                    |
| P-Homo              | [400 MHz, TFA-d/D <sub>2</sub> O (9:1, v/v), δ, ppm]: 8.47 (s, 1H, triazole-H), 5.5 (s, 2H, -COOCH <sub>2</sub> -), 4.5–4.8 (t, 3H, α-H and -CH <sub>2</sub> (CH <sub>2</sub> ) <sub>4</sub> CH <sub>2</sub> -NHC(NH)NH <sub>2</sub> ), 3.3 (t, 2H, -CH <sub>2</sub> (CH <sub>2</sub> ) <sub>4</sub> CH <sub>2</sub> NHC-(NH)NH <sub>2</sub> ), 2.76 (t, 2H, -CH <sub>2</sub> CH <sub>2</sub> COO-), 2.34–2.15 (m, 4H, -CH <sub>2</sub> CH <sub>2</sub> COO- and -CH <sub>2</sub> CH <sub>2</sub> (CH <sub>2</sub> ) <sub>3</sub> CH <sub>2</sub> NHC(NH)NH <sub>2</sub> ), 1.76 (m, 2H, -CH <sub>2</sub> (CH <sub>2</sub> ) <sub>3</sub> -CH <sub>2</sub> CH <sub>2</sub> NHC(NH)NH <sub>2</sub> ), 1.43–1.58 (m, 4H, -CH <sub>2</sub> CH <sub>2</sub> (CH <sub>2</sub> ) <sub>2</sub> CH <sub>2</sub> -NHC(NH)NH <sub>2</sub> ). |
| P-Ben               | [400 MHz, TFA-d/D <sub>2</sub> O (9:1, v/v), δ, ppm]: 8.1 (s, 1H, triazole-H), 7.2–7.0 (m, 1H, ArH), 5.1 (s, 2H, -COOCH <sub>2</sub> -), 4.48–4.2 (t, 2.8H, α-H, and -CH <sub>2</sub> (CH <sub>2</sub> ) <sub>4</sub> CH <sub>2</sub> NHC(NH)NH <sub>2</sub> ), 3.4 (m, 0.2H, -CH <sub>2</sub> Ar), 2.9 (t, 1.8H, -CH <sub>2</sub> CH <sub>2</sub> (CH <sub>2</sub> ) <sub>3</sub> CH <sub>2</sub> NHC(NH)NH <sub>2</sub> ), 1.51–1.32 (m, 2H, 1.8H, -CH <sub>2</sub> (CH <sub>2</sub> ) <sub>3</sub> CH <sub>2</sub> CH <sub>2</sub> NHC(NH)NH <sub>2</sub> ), 1.1 (m, 3.6H, -CH <sub>2</sub> CH <sub>2</sub> (CH <sub>2</sub> ) <sub>2</sub> CH <sub>2</sub> CH <sub>2</sub> NHC(NH)NH <sub>2</sub> ).                                                                                                                           |
| P-Biph              | [400 MHz, TFA-d/D <sub>2</sub> O (9:1, v/v), δ, ppm]: 8.1 (s, 1H, triazole-H), 7.52–6.91 (m, 0.9H, ArH), 5.1 (s, 2H, -COOCH <sub>2</sub> -), 4.47–4.21 (t, 2.8H, α-H, and -CH <sub>2</sub> (CH <sub>2</sub> ) <sub>4</sub> CH <sub>2</sub> NHC(NH)NH <sub>2</sub> ), 3.51 (m, 0.2H, -CH <sub>2</sub> Ar), 2.92 (t, 1.8H, -CH <sub>2</sub> CH <sub>2</sub> (CH <sub>2</sub> ) <sub>3</sub> CH <sub>2</sub> NHC(NH)NH <sub>2</sub> ), 1.52–1.3 (m, 1.8H, -CH <sub>2</sub> (CH <sub>2</sub> ) <sub>3</sub> CH <sub>2</sub> CH <sub>2</sub> NHC(NH)NH <sub>2</sub> ), 1.12 (m, 3.6H, -CH <sub>2</sub> CH <sub>2</sub> (CH <sub>2</sub> ) <sub>2</sub> CH <sub>2</sub> CH <sub>2</sub> NHC(NH)NH <sub>2</sub> ).                                                                                                                        |
| P-Naph              | [400 MHz, TFA-d/D <sub>2</sub> O (9:1, v/v), δ, ppm]: 8.1 (s, 1H, triazole-H), 7.91–7.12 (m, 0.7H, ArH), 5.1 (s, 2H, -COOCH <sub>2</sub> -), 4.45–4.19 (t, 2.8H, α-H and -CH <sub>2</sub> (CH <sub>2</sub> ) <sub>4</sub> CH <sub>2</sub> NHC(NH)NH <sub>2</sub> ), 3.41 (m, 0.2H, -CH <sub>2</sub> Ar), 2.9 (t, 1.8H, -CH <sub>2</sub> CH <sub>2</sub> (CH <sub>2</sub> ) <sub>3</sub> CH <sub>2</sub> NHC(NH)NH <sub>2</sub> ), 1.51–1.32 (m, 1.8H,                                                                                                                                                                                                                                                                                                                                                                              |

|        |                                                                                                                                                                                                                                                                                                                                                                                                                                                                                                                                                                                                                                                               |
|--------|---------------------------------------------------------------------------------------------------------------------------------------------------------------------------------------------------------------------------------------------------------------------------------------------------------------------------------------------------------------------------------------------------------------------------------------------------------------------------------------------------------------------------------------------------------------------------------------------------------------------------------------------------------------|
|        | $-\text{CH}_2(\text{CH}_2)_3\text{CH}_2\text{CH}_2\text{NHC}(\text{NH})\text{NH}_2$ ), 1.12 (m, 3.6H, $-\text{CH}_2\text{CH}_2(\text{CH}_2)_2$<br>$-\text{CH}_2\text{CH}_2\text{NHC}(\text{NH})\text{NH}_2$ ).                                                                                                                                                                                                                                                                                                                                                                                                                                                |
| P-Anth | [400 MHz, TFA-d/D <sub>2</sub> O (9:1, v/v), $\delta$ , ppm]: 8.1 (s, 1H, triazole-H),<br>7.91–6.02 (m, 0.9H, ArH), 5.1 (s, 2H, $-\text{COOCH}_2-$ ), 4.46–4.22 (t,<br>2.8H, $\alpha$ -H and $-\text{CH}_2(\text{CH}_2)_4\text{CH}_2\text{NHC}(\text{NH})\text{NH}_2$ ), 3.52 (m, 0.2H, $-\text{CH}_2\text{Ar}$ ),<br>2.9 (t, 1.8H, $-\text{CH}_2\text{CH}_2(\text{CH}_2)_3\text{CH}_2\text{NHC}(\text{NH})\text{NH}_2$ ), 1.50–1.31 (m, 1.8H,<br>$-\text{CH}_2(\text{CH}_2)_3\text{CH}_2\text{CH}_2\text{NHC}(\text{NH})\text{NH}_2$ ), 1.13 (m, 3.6H,<br>$-\text{CH}_2\text{CH}_2(\text{CH}_2)_2\text{CH}_2\text{CH}_2\text{NHC}(\text{NH})\text{NH}_2$ )   |
| P-Pyre | [400 MHz, TFA-d/D <sub>2</sub> O (9:1, v/v), $\delta$ , ppm]: 8.1 (s, 1H, triazole-H),<br>8.02–6.90 (m, 0.9H, ArH), 5.12 (s, 2H, $-\text{COOCH}_2-$ ), 4.45–4.20 (t,<br>2.8H, $\alpha$ -H and $-\text{CH}_2(\text{CH}_2)_4\text{CH}_2\text{NHC}(\text{NH})\text{NH}_2$ ), 3.51 (m, 0.2H, $-\text{CH}_2\text{Ar}$ ),<br>2.93 (t, 1.8H, $-\text{CH}_2\text{CH}_2(\text{CH}_2)_3\text{CH}_2\text{NHC}(\text{NH})\text{NH}_2$ ), 1.51–1.31 (m, 1.8H,<br>$-\text{CH}_2(\text{CH}_2)_3\text{CH}_2\text{CH}_2\text{NHC}(\text{NH})\text{NH}_2$ ), 1.1 (m, 3.6H,<br>$-\text{CH}_2\text{CH}_2(\text{CH}_2)_2\text{CH}_2\text{CH}_2\text{NHC}(\text{NH})\text{NH}_2$ ). |

**References:**

1. R. Zhang, N. Zheng, Z. Song, L. Yin and J. Cheng, *Biomaterials*, 2014, **35**, 3443-3454.
